# Supplementary material for: PSTPIP2 dysregulation contributes to aberrant terminal differentiation in GATA-1-deficient megakaryocytes by activating LYN
Source: PubMed Central journal article supplement — Cell Death Dis. 2014 Jan 9;5(1):e988–. doi: 10.1038/cddis.2013.512 (PMC4040682; doi:10.1038/cddis.2013.512), 2014-01-09
Supplement: cddis2013512x1.pdf [file cddis2013512x1.pdf]

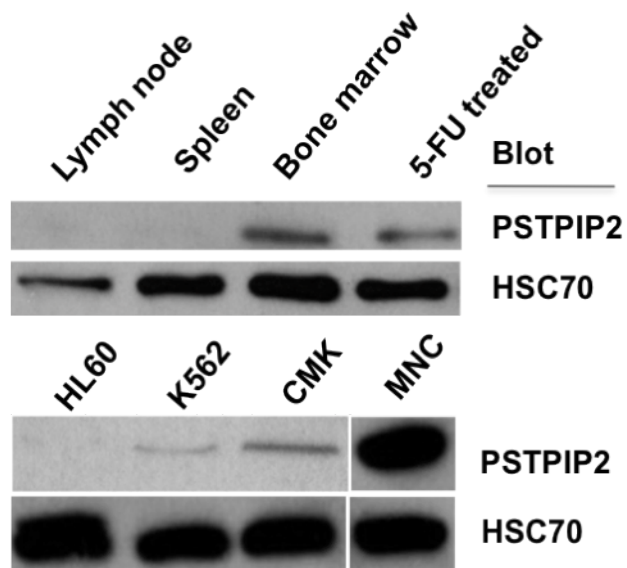

**Supplemental Figure S1 PSTPIP2 expression in tissues and cell lines.** Protein lysates of cells isolated from mouse lymph node, spleen, bone marrow or 5<sup>2</sup>-FU treated bone marrow were used for probing PSTPIP2 expression. Protein lysates of HL-60, K562, CMK cells, or mononuclear cells (MNC) isolated from human cord blood were also used for detecting PSTPIP2 expression. HSC70 served as loading control. Repositioned lanes were from the same probe.

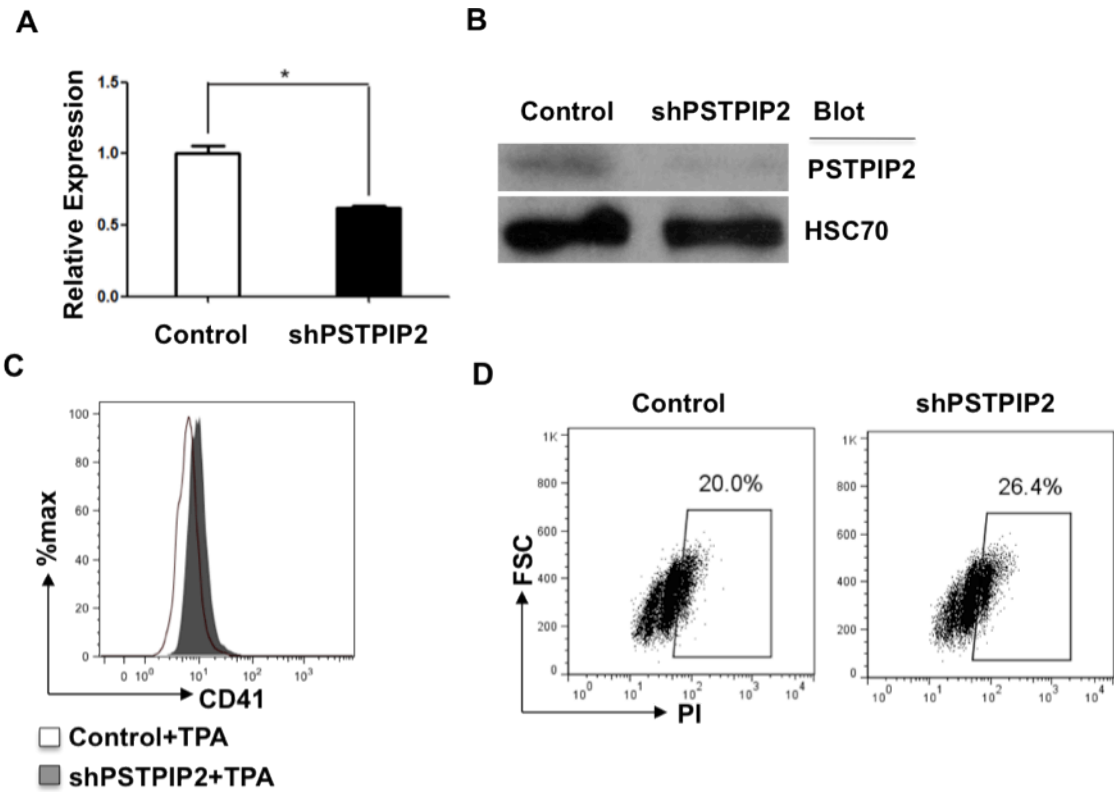

**Supplemental Figure S2 PSTPIP2 downregulation promotes K562**

**differentiation.** (A) K562 cells were infected with a control lentivirus or a lentivirus expressing shRNA specific for human PSTPIP2 (shPSTPIP2). The downregulation of PSTPIP2 mRNA was confirmed by quantitative RT-PCR. (B) The protein expression level of PSTPIP2 in control cells or shPSTPIP2 cells was also measured by western blot. (C) The control or shPSTPIP2 cells were treated with or without TPA (10 nM) for 2 days. The expression of CD41 were measured by staining with anti-CD41-PE antibody and analyzed by flow cytometry. (D) The TPA-treated control or shPSTPIP2 K562 cells were further fixed, permeablized, and stained with PI. The DNA content was analyzed by flow cytometry. Numbers indicate percentage of the gated cells with DNA content greater than 4N.

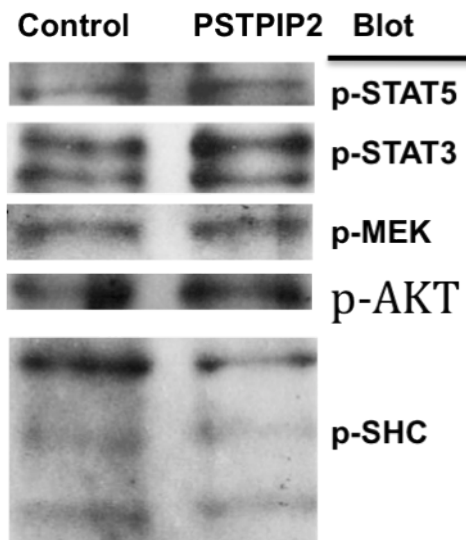

**Supplemental Figure S3 The effect of PSTPIP2 overexpression on TPO signaling.** G1ME cells were infected with control retrovirus or a retrovirus overexpressing PSTPIP2. The infected cells were selected with puromycin for 48 hours and used for western blot to detect phosphorylation of signaling molecules downstream of TPO signaling as indicated.
